# Supplementary material for: WITHDRAWN: Young and Old Leaves Physiological and Metabolite Profiles Analysis on Amino Acids and Organic Acids in Wild Soybean Seedlings Under Nitrogen Deficiency
Source: Research Square preprint supplement (doi:10.21203/rs.3.rs-1142628/v1), 2021-12-08
Supplement: Supplementary file 1 [file 4e0910db461a71847670c2dc.xlsx]

## Sheet: Sheet1
Supplementary material 1. Biomass of two ecotype wild soybean ecotypes under control and LN stress.
parameters	GS1			GS2
	CK	LN	log2(LN/CK)	CK	LN	log2(LN/CK)
Shoot height（cm）	117.00 ± 0.18	108.00 ± 0.20	−0.12*	126.00 ± 0.02	124.00 ± 0.31	−0.02
Root length（cm）	30.50 ± 0.10	31.50 ± 0.08	0.05*	32.00 ± 0.09	35.50 ± 0.04	0.15*
Shoot DW（g）	9.98 ± 0.13	5.28 ± 0.02	−0.92**	11.30 ± 0.03	7.92 ± 0.00	−0.51*
Root DW（g）	1.37 ± 0.25	1.07 ± 0.30	−0.36**	1.57 ± 0.02	1.30 ± 0.01	−0.27*
Values are presented as mean ± standard deviation of four biological replicates; GS1, common wild soybean; GS2, low nitrogen-tolerant wild soybean; CK, control treatment; LN, low nitrogen stress; Significant differences between controls and LN treatments were determined by the One-Way ANOVA test and marked as “*” (P < 0.05) and “**” (P < 0.01).
