# Supplementary material for: WITHDRAWN: Young and Old Leaves Physiological and Metabolite Profiles Analysis on Amino Acids and Organic Acids in Wild Soybean Seedlings Under Nitrogen Deficiency
Source: Research Square preprint supplement (doi:10.21203/rs.3.rs-1142628/v1), 2021-12-08
Supplement: Supplementary file 2 [file 7fa6479e43f5b069174549bf.xlsx]

## Sheet: Sheet1
Supplementary material 2 The contributions of ions among young and old leaves of GS1 and GS2 seedlings to the first principal component (PC1) and the second principal component (PC2).
Young leaves			Old leaves
Ion	PC1	PC2	PC1	PC2
Cl-	0.365301	-0.0821835	-0.397521	0.021447
NO3−	-0.189781	0.626966	0.411337	-0.0175837
H2PO4−	0.240797	-0.220259	-0.281851	-0.157048
SO42−	-0.120376	0.289924	0.144006	0.76856
C2O42−	0.22197	0.260816	0.0192414	-0.127335
Mn﻿2+	0.299585	0.359118	-0.0538686	0.391831
B3+	0.532247	0.0895397	-0.421594	0.122
Fe3+	0.395622	0.0256362	-0.24129	0.188122
Zn2+	0.353688	0.241178	-0.37355	0.100768
Na+	0.0510175	-0.253266	-0.180831	0.326359
Mg2+	-0.0494456	0.243469	0.182877	0.148147
Ca2+	0.0348952	-0.0400568	0.212499	0.094631
K+	-0.060433	-0.124982	0.00876701	-0.0667582
P5+	0.2103	-0.251219	-0.287142	-0.108806
